# Supplementary material for: Shedding Light on Heavy Metal Contamination: Fluorescein-Based Chemosensor for Selective Detection of Hg2+ in Water
Source: MDPI journal article supplement (doi:10.3390/ijms25063186), 2024-03-10
Supplement: s1 [file s1]

# Supporting Information

## Shedding Light on Heavy Metal Contamination: Fluorescein-Based Chemosensor for Selective Detection of Hg<sup>2+</sup> in Water

Maksim N. Zavalishin <sup>1,\*</sup>, Alexey N. Kiselev <sup>2</sup>, Alexandra K. Isagulieva <sup>3,4</sup>, Anna V. Shibaeva <sup>5</sup>, Vladimir A. Kuzmin <sup>5,6</sup>, Vladimir N. Morozov <sup>5</sup>, Eugene A. Zevakin <sup>7</sup>, Ulyana A. Petrova <sup>1</sup>, Alina A. Knyazeva <sup>1</sup>, Alexey V. Eroshin <sup>1</sup>, Yuriy A. Zhabanov <sup>1</sup> and George A. Gamov <sup>1</sup>

<sup>1</sup> Faculty of Inorganic Chemistry and Technology, Ivanovo State University of Chemistry and Technology, 153000 Ivanovo, Russia;  
petrowa.ulya2015@yandex.ru (U.A.P.); knyazeva\_alina1@mail.ru (A.A.K.);  
alexey.yeroshin@gmail.com (A.V.E.); zhabanov@gmail.com (Y.A.Z.); ggamov@isuct.ru (G.A.G.)

<sup>2</sup> G.A. Krestov Institute of Solution Chemistry, Russian Academy of Sciences, 153045 Ivanovo, Russia; scatol@yandex.ru

<sup>3</sup> Burnazyan Federal Medical Biophysical Center, Federal Medical Biological Agency of the Russian Federation, 123182 Moscow, Russia; kia2303@ya.ru

<sup>4</sup> Institute of Gene Biology, Russian Academy of Sciences, 119991 Moscow, Russia

<sup>5</sup> Emanuel Institute of Biochemical Physics, Russian Academy of Sciences, 119334 Moscow, Russia; anna-shiba@mail.ru (A.V.S.); vladimirkuzmin7@gmail.com (V.A.K.); morozov.v.n@mail.ru (V.N.M.)

<sup>6</sup> National Research Nuclear University MEPhI, 115409 Moscow, Russia

<sup>7</sup> Vernadsky Institute of Geochemistry and Analytical Chemistry, Russian Academy of Sciences, 119991 Moscow, Russia; ezevak.zev@yandex.ru

\* Correspondence: zavalishin\_mn@isuct.ru; Tel.: +7-9106957233

### Table of Contents

1. **Figure S1.** Results of predicting the sensing ability of chemosensor **1** towards metal ions based on chemical formulae
2. **Figure S2.** MALDI TOF mass spectrum of mixture of chemosensor **1** + Hg<sup>2+</sup>
3. **Figure S3.** Example of titration results of chemosensor **1** with Hg<sup>2+</sup> ions in KEV software (stoichiometric model M:L = 1:1)
4. **Figure S4.** Example of titration results of chemosensor **1** with Hg<sup>2+</sup> ions in KEV software (stoichiometric model M:L = 1:2)
5. **Figure S5.** Possible reaction scheme between chemosensor **1** and Hg<sup>2+</sup> ion
6. **Figure S6.** The fluorescence detection limit of chemosensor **1** in H<sub>2</sub>O-DMSO (8:2 v:v)
7. **Table S1.** Structures of selected fluorescence probes for Hg<sup>2+</sup> ions in the literature
8. **Figure S7.** An example of spectral measurements of chemosensor **1** in the presence of Hg<sup>2+</sup> ions (30 µM) in the sample (Uhtokhma river)
9. **Figure S8.** Two conformers of **1** and transition state molecular models
10. **Table S2.** Calculated composition of the lowest excited states and corresponding oscillator strengths for **1**
11. **Table S3.** Shapes of molecular orbitals participating in electronic transitions

12. **Figure S9.** IR spectrum of chemosensor **1**
13. **Figure S10.** MALDI TOF mass of chemosensor **1**
14. **Figure S11.**  $^1\text{H}$  NMR spectra of chemosensor **1**
15. **Figure S12.**  $^{13}\text{C}$  NMR spectra of chemosensor **1**
16. **Figure S13.** Cartesian coordinates of quantum chemical structures

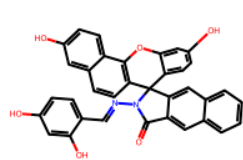

Zn(II)

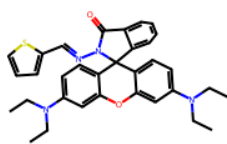

Hg(II)

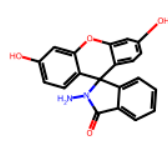

Cu(II)

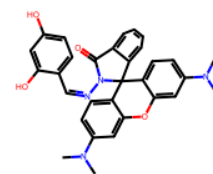

Cu(II)

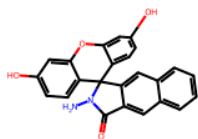

Cu(II)

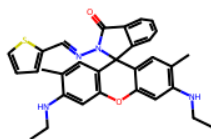

Hg(II)

**Figure S1.** Results of predicting the sensing ability of chemosensor **1** towards metal ions based on chemical formulae

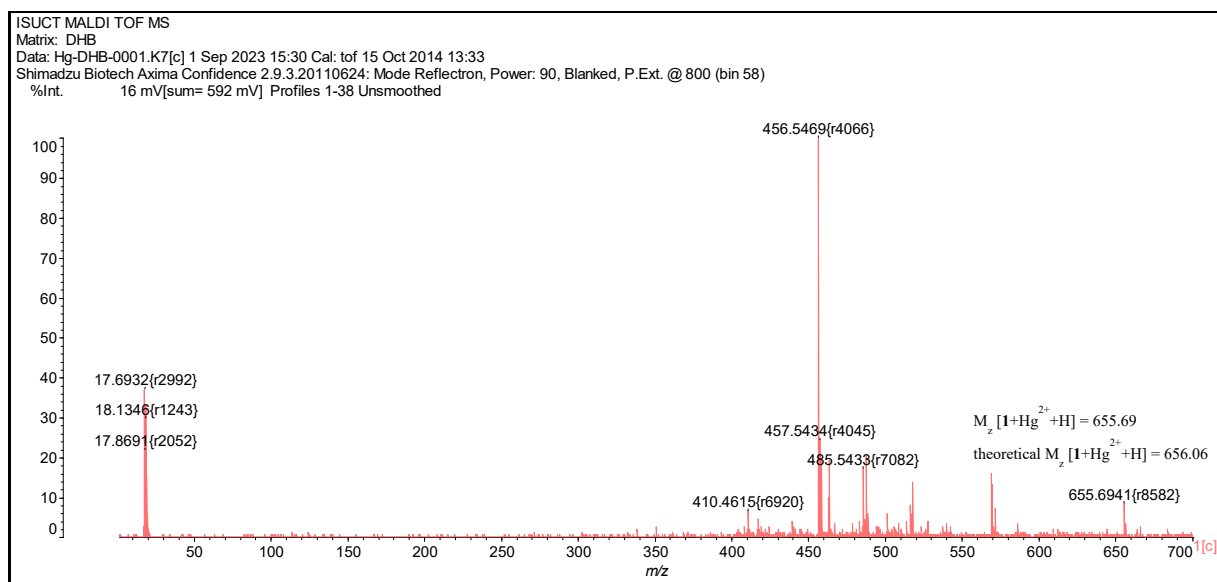

**Figure S2.** MALDI TOF mass spectrum of mixture of chemosensor **1** +  $\text{Hg}^{2+}$

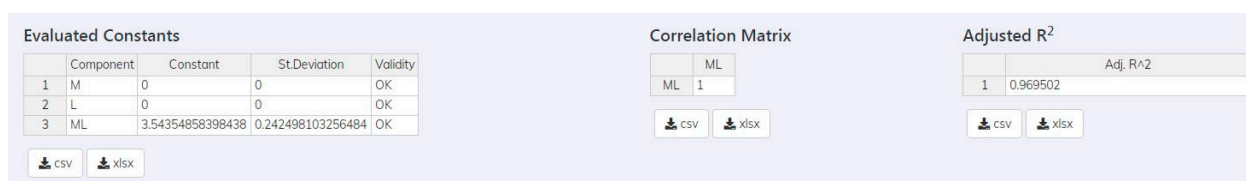

**Figure S3.** Example of titration results of chemosensor 1 with  $\text{Hg}^{2+}$  ions in Kev software (stoichiometric model M:L = 1:1)

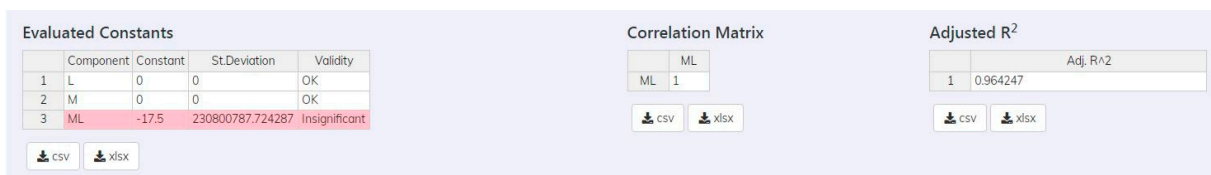

**Figure S4.** Example of titration results of chemosensor 1 with  $\text{Hg}^{2+}$  ions in KEV software (stoichiometric model M:L = 1:2)

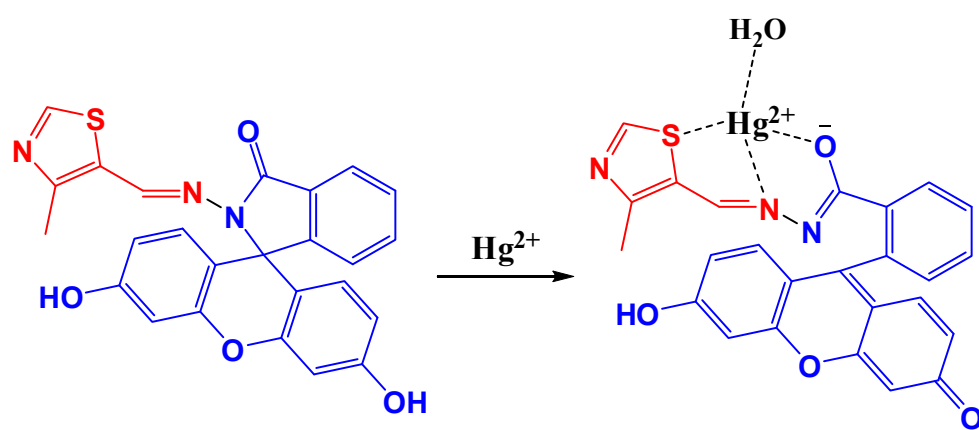

**Figure S5.** Possible reaction scheme between chemosensor **1** and  $\text{Hg}^{2+}$  ion

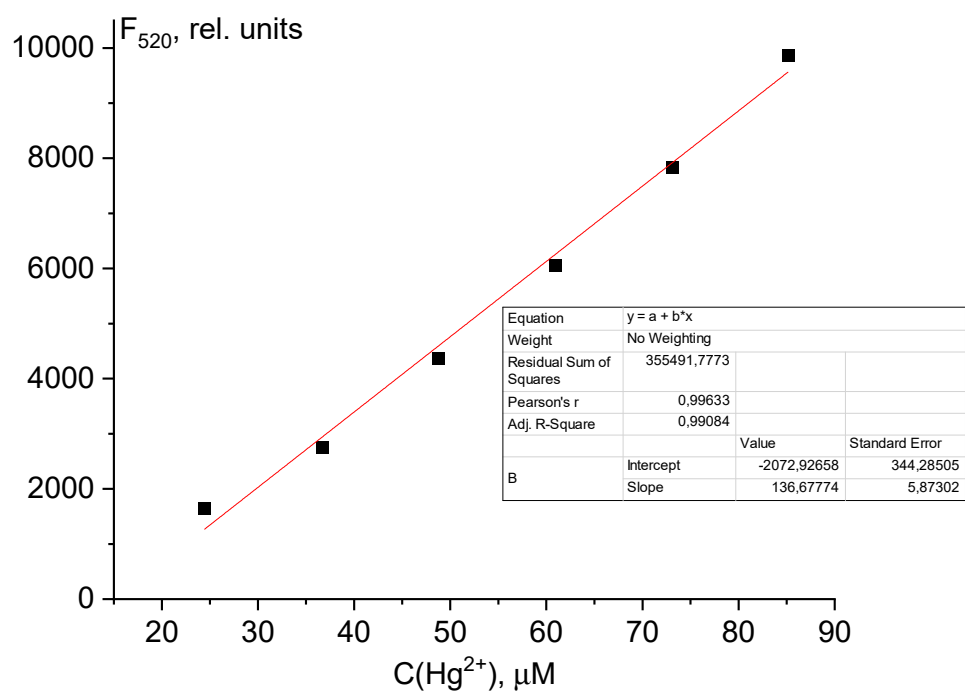

$$\text{LOD} = 3\sigma/\text{slope} = 3 \cdot 10.6/136.677 = 0.23 \mu\text{M}$$

**Figure S6.** The fluorescence detection limit of chemosensor **1** in  $\text{H}_2\text{O}$ -DMSO (8:2 v:v)



**Table S1** – Structures of selected fluorescence probes for Hg<sup>2+</sup> ions in the literature

| Ref. | Structure                                                                           | Signal type | LOD (μM) | Solvent                         |
|------|-------------------------------------------------------------------------------------|-------------|----------|---------------------------------|
| [1]  | 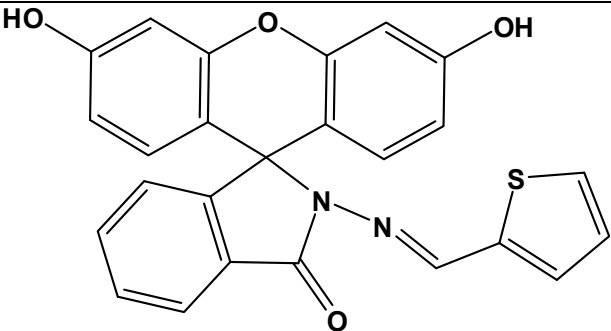   | Turn-on     | 0.24     | DMSO/H <sub>2</sub> O = 1/9 v/v |
| [2]  |    | Turn-on     | 0.33     | MeCN                            |
| [3]  |   | Turn-on     | 0.04     | EtOH/H <sub>2</sub> O = 1/1 v/v |
| [4]  |  | Turn-on     | 0.48     | MeCN/H <sub>2</sub> O = 9/1 v/v |
| [5]  |  | Turn-on     | 1.16     | MeOH/H <sub>2</sub> O = 7/3 v/v |

|           |                                                                                    |          |      |                                 |
|-----------|------------------------------------------------------------------------------------|----------|------|---------------------------------|
| [6]       | 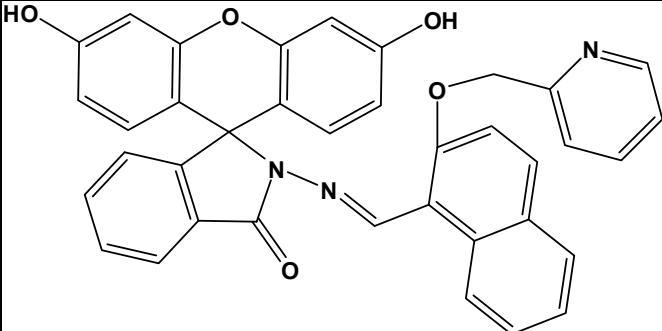  | Turn-on  | 1.24 | HEPES buffer, pH 7.2            |
| [7]       |   | Turn-off | 0.34 | H <sub>2</sub> O                |
| This work |  | Turn-on  | 0.23 | H <sub>2</sub> O/DMSO = 8/2 v/v |

#### References:

1. Chiou, Y.-R.; Wan, C.-F.; Wu, A.-T. A Selective Colorimetric and Turn-on Fluorescent Chemosensor for Hg<sup>2+</sup> in Aqueous Solution. *J. Fluoresc.* **2017**, *27*, 317–322, doi:10.1007/s10895-016-1960-7.
2. Kang, H.; Xu, H.; Fan, C.; Liu, G.; Pu, S. A New Sensitive Symmetric Fluorescein-Linked Diarylethene Chemosensor for Hg<sup>2+</sup> Detection. *J. Photochem. Photobiol. Chem.* **2018**, *367*, 465–470, doi:10.1016/j.jphotochem.2018.09.001.
3. Huang, L.; Sun, Y.; Zhao, G.; Wang, L.; Meng, X.; Zhou, J.; Duan, H. A Novel Fluorescein-Based Fluorescent Probe for Detection Hg<sup>2+</sup> and Bioimaging Applications. *J. Mol. Struct.* **2022**, *1255*, 132427, doi:10.1016/j.molstruc.2022.132427.
4. Erdemir, S. Fluorometric Dual Sensing of Hg<sup>2+</sup> and Al<sup>3+</sup> by Novel Triphenylamine Appended Rhodamine Derivative in Aqueous Media. *Sens. Actuators B Chem.* **2019**, *290*, 558–564, doi:10.1016/j.snb.2019.04.037.
5. Wang, S.; Ding, H.; Wang, Y.; Fan, C.; Liu, G.; Pu, S. Novel Multi-Responsive Fluorescence Switch for Hg<sup>2+</sup> and UV/Vis Lights Based on Diarylethene-Rhodamine Derivative. *Tetrahedron* **2019**, *75*, 1517–1524, doi:10.1016/j.tet.2019.01.071.
6. Mohammad, H.; Islam, A.S.M.; Prodhan, C.; Ali, M. A Fluorescein-Based Chemosensor for “Turn-on” Detection of Hg<sup>2+</sup> and the Resultant Complex as a Fluorescent Sensor for S<sup>2-</sup> in Semi-Aqueous Medium with Cell-Imaging Application: Experimental and Computational Studies. *New J. Chem.* **2019**, *43*, 5297–5307, doi:10.1039/C8NJ05418E.
7. Rathod, R.V.; Bera, S.; Maity, P.; Mondal, D. Mechanochemical Synthesis of a Fluorescein-Based Sensor for the Selective Detection and Removal of Hg<sup>2+</sup> Ions in Industrial Effluents. *ACS Omega* **2020**, *5*, 4982–4990, doi:10.1021/acsomega.9b03885.

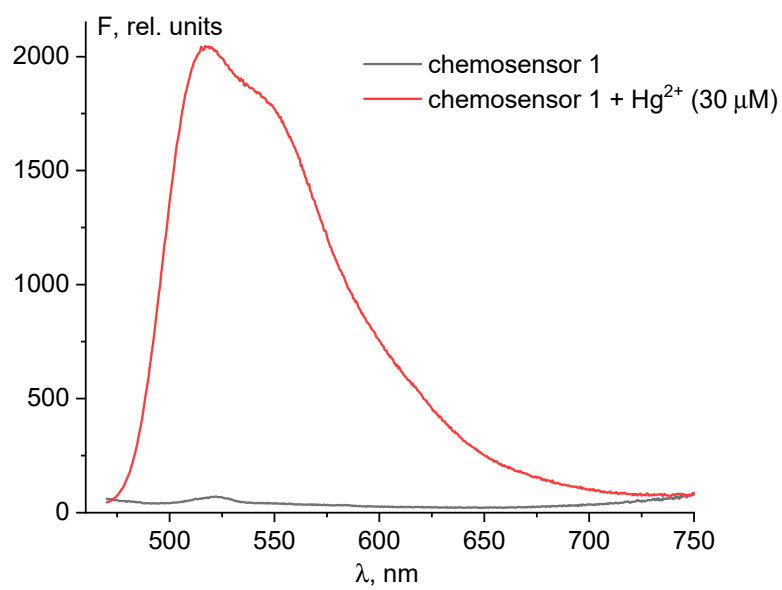

**Figure S7.** An example of spectral measurements of chemosensor **1** in the presence of Hg<sup>2+</sup> ions (30 μM) in the sample (Uhtokhma river)

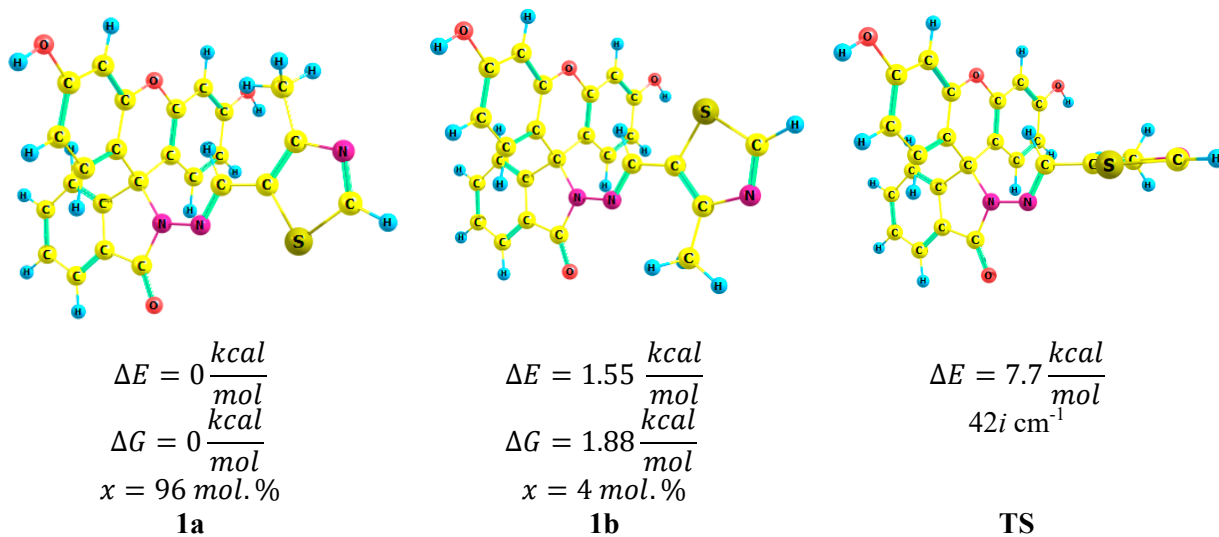

**Figure S8.** Two conformers of **1** and transition state molecular models.

**Table S2.** Calculated composition of the lowest excited states and corresponding oscillator strengths for **1**.

| State               | $\lambda$ , nm | oscillator strength, $f^a$ | Composition (%) <sup>b</sup>                                                                                                                                 |
|---------------------|----------------|----------------------------|--------------------------------------------------------------------------------------------------------------------------------------------------------------|
| 1 <sup>1</sup> A'   | 319            | 0,78                       | 7a'' → 1a''* (100)                                                                                                                                           |
| 4 <sup>1</sup> A'   | 257            | 0,07                       | 5a'' → 1a''* (5)<br>6a'' → 1a''* (27)<br>6a'' → 3a''* (5)<br>6a'' → 4a''* (7)<br>5a' → 1a'* (45)                                                             |
| 6 <sup>1</sup> A''  | 249            | 0,08                       | 3a' → 1a''* (5)<br>4a' → 1a''* (5)<br>4a' → 3a''* (10)<br>4a' → 4a''* (5)<br>6a'' → 1a'* (27)<br>5a' → 4a''* (20)<br>5a' → 5a''* (13)<br>7a'' → 1a'* (6)     |
| 12 <sup>1</sup> A'' | 234            | 0,05                       | 1a' → 1a''* (11)<br>2a' → 1a''* (6)<br>4a' → 1a''* (58)<br>7a'' → 1a'* (19)                                                                                  |
| 15 <sup>1</sup> A'  | 224            | 0,1                        | 3a'' → 1a''* (15)<br>3a'' → 2a''* (8)<br>4a'' → 1a''* (32)<br>4a'' → 2a''* (6)<br>5a'' → 1a''* (8)<br>4a' → 1a'* (6)<br>6a'' → 3a''* (8)<br>7a'' → 2a''* (7) |
| 16 <sup>1</sup> A'  | 220            | 0,15                       | 4a'' → 1a''* (10)<br>4a' → 1a'* (37)                                                                                                                         |

|                     |     |      |                   |
|---------------------|-----|------|-------------------|
|                     |     |      | 6a'' → 3a''* (5)  |
|                     |     |      | 6a'' → 5a''* (10) |
|                     |     |      | 7a'' → 3a''* (16) |
| 17 <sup>1</sup> A'  | 218 | 0,37 | 4a' → 1a'* (25)   |
|                     |     |      | 5a' → 1a'* (6)    |
|                     |     |      | 7a'' → 3a''* (51) |
| 18 <sup>1</sup> A'' | 215 | 0,12 | 1a' → 1a''* (36)  |
|                     |     |      | 4a' → 1a''* (7)   |
|                     |     |      | 4a' → 5a''* (5)   |
|                     |     |      | 6a'' → 1a'* (16)  |
|                     |     |      | 5a' → 2a''* (11)  |
|                     |     |      | 5a' → 3a''* (5)   |
|                     |     |      | 5a' → 4a''* (8)   |
| 20 <sup>1</sup> A'' | 211 | 0,07 | 1a' → 1a''* (7)   |
|                     |     |      | 4a' → 5a''* (7)   |
|                     |     |      | 6a'' → 1a'* (26)  |
|                     |     |      | 5a' → 3a''* (12)  |
|                     |     |      | 5a' → 4a''* (9)   |
|                     |     |      | 7a'' → 2a'* (25)  |
|                     |     |      | 7a'' → 8a'* (5)   |
| 21 <sup>1</sup> A'  | 211 | 0,13 | 5a'' → 1a''* (10) |
|                     |     |      | 6a'' → 2a''* (11) |
|                     |     |      | 6a'' → 3a''* (38) |
|                     |     |      | 5a' → 1a'* (10)   |
|                     |     |      | 7a'' → 3a''* (20) |
| 22 <sup>1</sup> A'' | 208 | 0,58 | 4a' → 2a''* (5)   |
|                     |     |      | 4a' → 3a''* (19)  |
|                     |     |      | 6a'' → 1a'* (9)   |
|                     |     |      | 5a' → 3a''* (13)  |
|                     |     |      | 5a' → 4a''* (27)  |

|             |     |      |                                |
|-------------|-----|------|--------------------------------|
|             |     |      | $5a' \rightarrow 5a''^* (11)$  |
| $23\ ^1A'$  | 207 | 0,1  | $3a'' \rightarrow 1a''^* (10)$ |
|             |     |      | $6a'' \rightarrow 2a''^* (29)$ |
|             |     |      | $7a'' \rightarrow 4a''^* (29)$ |
|             |     |      | $7a'' \rightarrow 5a''^* (10)$ |
|             |     |      | $7a'' \rightarrow 6a''^* (22)$ |
| $28\ ^1A''$ | 200 | 0,36 | $4a' \rightarrow 2a''^* (16)$  |
|             |     |      | $4a' \rightarrow 3a''^* (17)$  |
|             |     |      | $4a' \rightarrow 4a''^* (6)$   |
|             |     |      | $5a' \rightarrow 5a''^* (55)$  |
| $29\ ^1A'$  | 198 | 0,16 | $2a'' \rightarrow 1a''^* (17)$ |
|             |     |      | $3a'' \rightarrow 1a''^* (6)$  |
|             |     |      | $4a'' \rightarrow 3a''^* (5)$  |
|             |     |      | $5a'' \rightarrow 3a''^* (7)$  |
|             |     |      | $6a'' \rightarrow 3a''^* (5)$  |
|             |     |      | $6a'' \rightarrow 4a''^* (44)$ |
|             |     |      | $5a' \rightarrow 1a''^* (5)$   |
|             |     |      | $7a'' \rightarrow 5a''^* (6)$  |
| $30\ ^1A'$  | 196 | 0,08 | $1a'' \rightarrow 1a''^* (27)$ |
|             |     |      | $2a'' \rightarrow 1a''^* (5)$  |
|             |     |      | $6a'' \rightarrow 4a''^* (10)$ |
|             |     |      | $7a'' \rightarrow 5a''^* (14)$ |
|             |     |      | $7a'' \rightarrow 6a''^* (35)$ |

<sup>a</sup> bands with  $f > 0,05$  presented

<sup>b</sup> transitions with contribution  $> 5\%$  listed

**Table S3.** Shapes of molecular orbitals participating in electronic transitions

| Orbital         | Energy, eV | View 1                                                                               | View 2                                                                                |
|-----------------|------------|--------------------------------------------------------------------------------------|---------------------------------------------------------------------------------------|
| HOMO-11<br>1a'  | -10.13     | 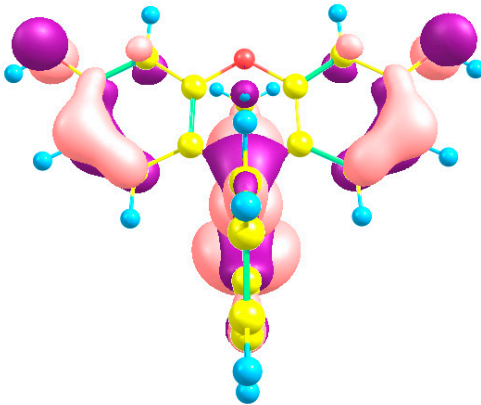   |    |
| HOMO-10<br>1a'' | -10.06     |   |   |
| HOMO-9<br>2a'   | -9.64      |  |  |
| HOMO-8<br>3a'   | -9.54      |  |  |



|        |       |                                                                                       |  |
|--------|-------|---------------------------------------------------------------------------------------|--|
| HOMO-7 | -9.25 | 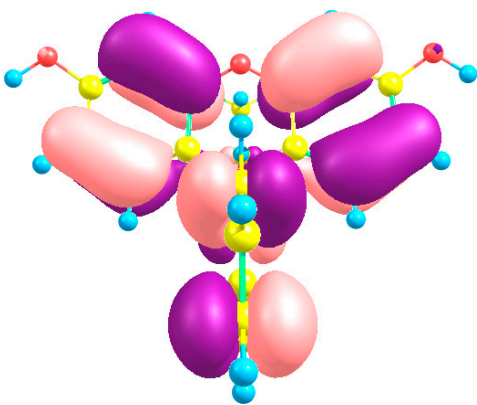    |  |
| 2a''   |       |    |  |
| HOMO-6 | -9.16 |    |  |
| 3a''   |       |   |  |
| HOMO-5 | -8.99 |   |  |
| 4a''   |       |  |  |
| HOMO-4 | -8.94 |   |  |
| 5a''   |       |  |  |

|        |       |                                                                                       |  |
|--------|-------|---------------------------------------------------------------------------------------|--|
| HOMO-3 | -8.32 | 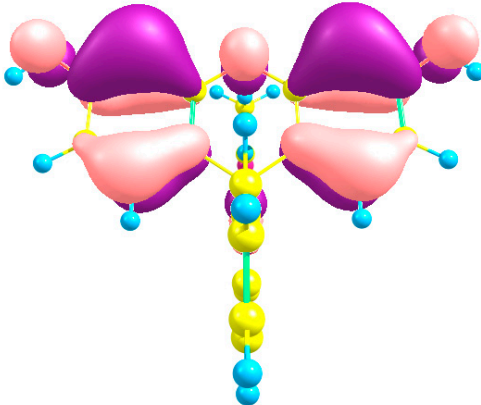    |  |
| 4a'    |       |    |  |
| HOMO-2 | -8.05 |    |  |
| 6a''   |       |    |  |
| HOMO-1 | -7.74 |   |  |
| 5a'    |       |  |  |
| HOMO   | -7.55 |   |  |
| 7a''   |       |  |  |

|        |       |                                                                                       |  |
|--------|-------|---------------------------------------------------------------------------------------|--|
| LUMO   | -1.14 | 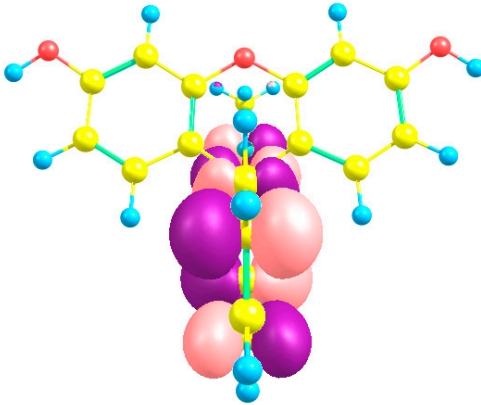    |  |
| 1a''*  |       |    |  |
| LUMO+1 | -0.18 |    |  |
| 2a''*  |       |    |  |
| LUMO+2 | 0.01  |   |  |
| 1a'*   |       |  |  |
| LUMO+3 | 0.13  |   |  |
| 3a''*  |       |  |  |

|        |      |                                                                                      |  |
|--------|------|--------------------------------------------------------------------------------------|--|
| LUMO+4 | 0.53 | 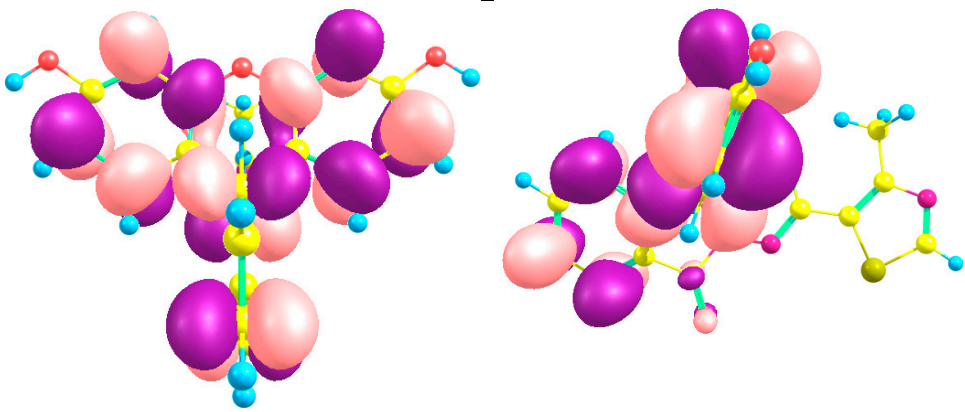   |  |
| LUMO+5 | 0.76 |   |  |
| LUMO+6 | 1.02 |  |  |
| LUMO+7 | 1.21 |  |  |

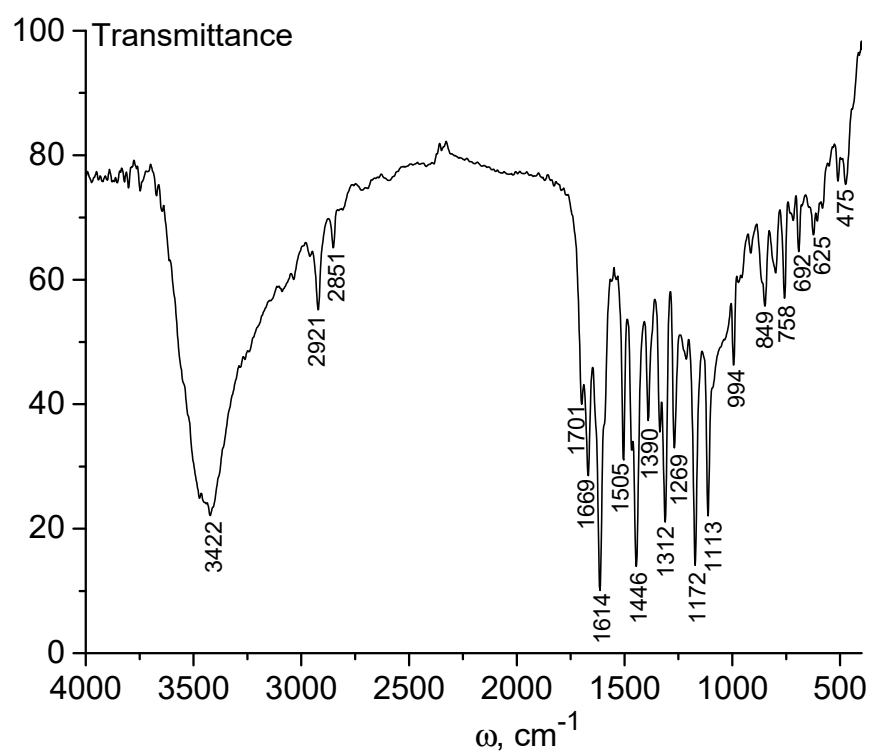

**Figure S9.** IR spectrum of chemosensor **1**

ISUCT MALDI TOF MS

Matrix: DHB

Data: 1-DHB-0001.J7[c] 1 Sep 2023 15:27 Cal: tof 15 Oct 2014 13:33

Shimadzu Biotech Axima Confidence 2.9.3.20110624: Mode Reflectron, Power: 91, Blanked, P.Ext. @ 800 (bin 58)

%Int. 45 mV[sum= 1664 mV] Profiles 1-37 Smooth Av 5 -Baseline 20

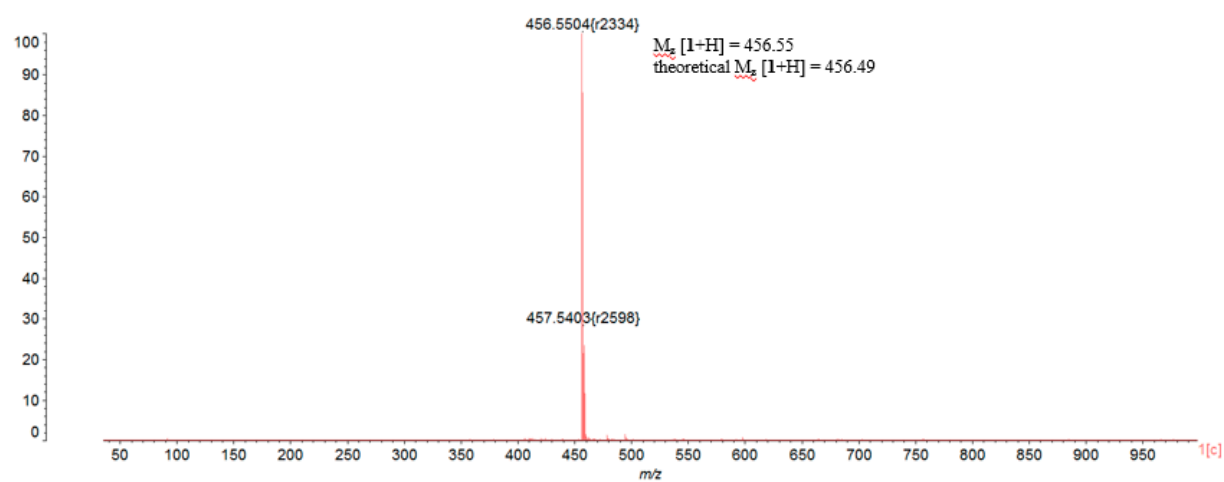

**Figure S10.** MALDI TOF mass spectrum of chemosensor **1**

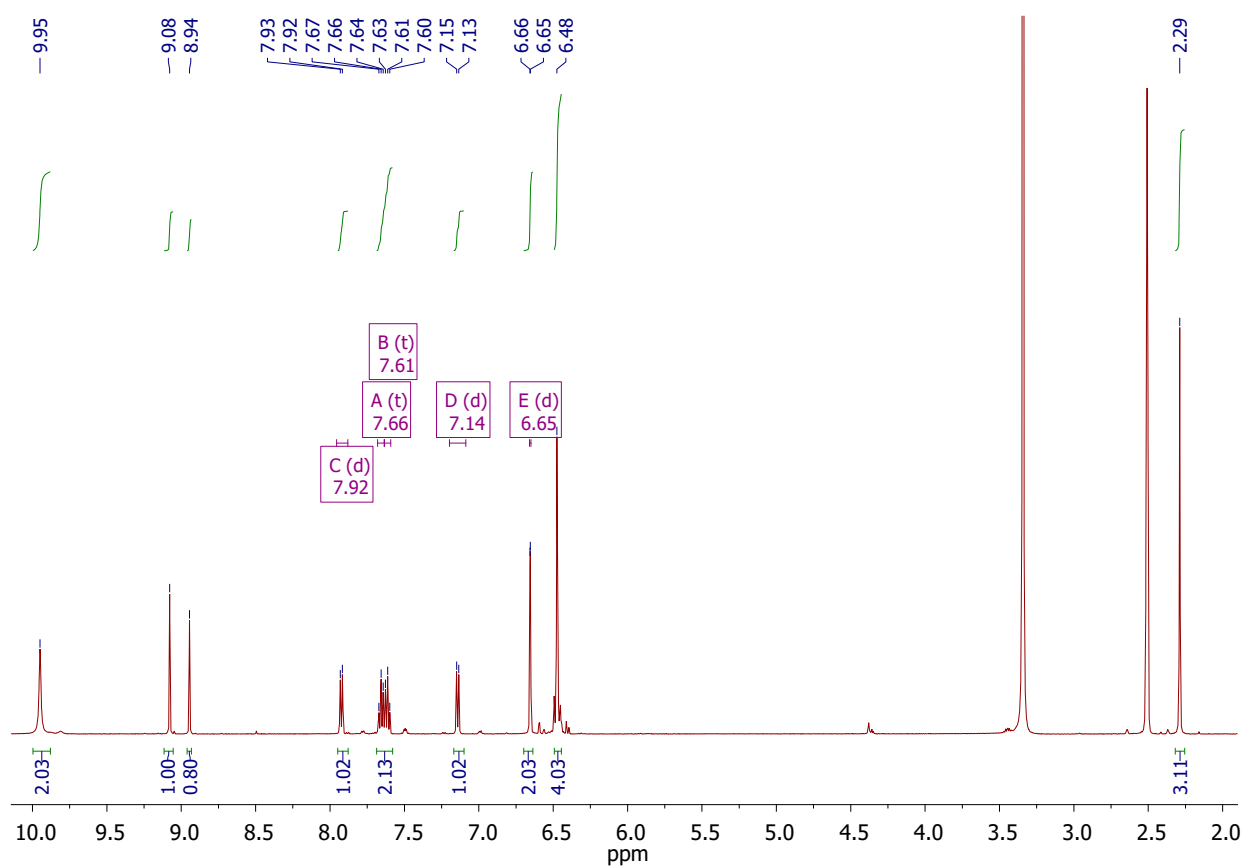

**Figure S11.** <sup>1</sup>H NMR spectra of chemosensor **1**



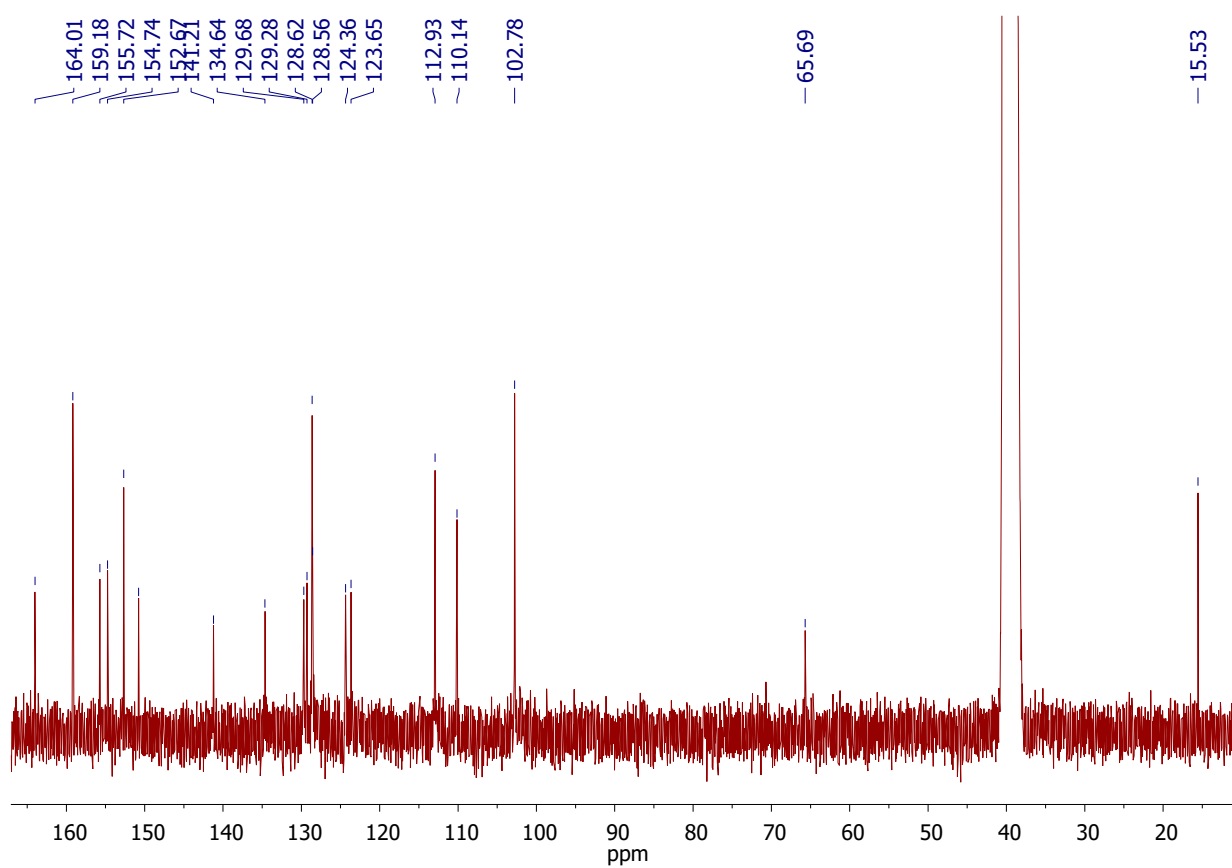

**Figure S12.** <sup>13</sup>C NMR spectra of chemosensor **1**



*Cartesian coordinates of 1a, calculated at B97D/def2-TZVP level of theory*

|   |              |              |              |
|---|--------------|--------------|--------------|
| C | 0.136193000  | -2.339592000 | -2.674602000 |
| C | 0.425991000  | -1.189189000 | -1.937473000 |
| O | 0.237681000  | -0.000162000 | -2.607670000 |
| C | 0.857476000  | -1.253392000 | -0.606964000 |
| C | 0.857579000  | 1.253295000  | -0.607160000 |
| C | 0.425971000  | 1.188938000  | -1.937598000 |
| C | 0.275001000  | -3.587906000 | -2.068184000 |
| C | 0.986903000  | -2.519875000 | -0.024903000 |
| C | 0.987166000  | 2.519844000  | -0.025271000 |
| C | 0.136055000  | 2.339260000  | -2.674820000 |
| C | 0.275004000  | 3.587645000  | -2.068574000 |
| C | 0.701140000  | 3.681260000  | -0.732208000 |
| H | 1.313065000  | 2.584843000  | 1.010121000  |
| H | -0.202280000 | 2.257448000  | -3.703217000 |
| H | 0.803387000  | 4.656327000  | -0.258547000 |
| C | 0.700900000  | -3.681361000 | -0.731732000 |
| H | -0.202019000 | -2.257888000 | -3.703049000 |
| H | 1.312666000  | -2.584803000 | 1.010539000  |
| H | 0.803021000  | -4.656372000 | -0.257925000 |
| O | -0.022622000 | -4.688302000 | -2.824382000 |
| H | 0.103893000  | -5.483394000 | -2.287700000 |
| O | -0.022743000 | 4.687960000  | -2.824847000 |
| H | 0.104102000  | 5.483119000  | -2.288340000 |
| C | 3.778371000  | -0.000092000 | -0.155204000 |
| C | 2.636836000  | -0.000025000 | 0.638662000  |
| C | 2.725838000  | 0.000088000  | 2.027123000  |
| C | 3.962031000  | 0.000143000  | 2.676092000  |
| C | 5.114843000  | 0.000071000  | 1.887830000  |
| C | 5.022589000  | -0.000049000 | 0.485340000  |
| C | 1.185141000  | 0.000001000  | 0.184746000  |
| N | 0.485336000  | 0.000143000  | 1.520922000  |
| C | 1.371329000  | 0.000180000  | 2.625898000  |
| H | 3.705885000  | -0.000170000 | -1.240679000 |
| H | 4.006849000  | 0.000249000  | 3.762598000  |
| H | 6.095006000  | 0.000102000  | 2.359526000  |
| H | 5.932914000  | -0.000100000 | -0.110451000 |
| O | 1.056403000  | 0.000262000  | 3.798185000  |
| N | -0.837164000 | 0.000220000  | 1.742779000  |
| C | -1.669618000 | 0.000178000  | 0.751274000  |
| C | -3.092430000 | 0.000184000  | 0.970039000  |
| C | -4.089183000 | -0.000038000 | -0.000410000 |
| N | -5.374057000 | -0.000171000 | 0.485244000  |
| C | -5.377344000 | -0.000135000 | 1.792326000  |
| S | -3.820944000 | 0.000261000  | 2.551675000  |
| H | -6.284998000 | -0.000197000 | 2.389966000  |

*Cartesian coordinates of 1b, calculated at B97D/def2-TZVP level of theory*

|   |              |             |              |
|---|--------------|-------------|--------------|
| C | -0.425796000 | 2.401104000 | -2.699649000 |
| C | -0.631167000 | 1.233393000 | -1.961110000 |
| O | -0.539090000 | 0.061286000 | -2.678382000 |

|   |              |              |              |
|---|--------------|--------------|--------------|
| C | -0.897018000 | 1.266491000  | -0.586638000 |
| C | -0.891497000 | -1.239370000 | -0.643889000 |
| C | -0.624993000 | -1.142618000 | -2.015187000 |
| C | -0.480631000 | 3.634485000  | -2.050570000 |
| C | -0.944724000 | 2.518068000  | 0.038036000  |
| C | -0.933649000 | -2.518255000 | -0.076807000 |
| C | -0.413309000 | -2.274536000 | -2.805683000 |
| C | -0.462291000 | -3.536346000 | -2.213288000 |
| C | -0.720662000 | -3.661685000 | -0.837180000 |
| H | -1.131983000 | -2.608607000 | 0.988605000  |
| H | -0.203018000 | -2.167891000 | -3.865483000 |
| H | -0.752732000 | -4.646985000 | -0.374805000 |
| C | -0.737949000 | 3.695832000  | -0.669850000 |
| H | -0.215921000 | 2.343699000  | -3.763327000 |
| H | -1.142698000 | 2.558775000  | 1.106556000  |
| H | -0.774281000 | 4.658934000  | -0.163116000 |
| O | -0.270851000 | 4.752621000  | -2.810363000 |
| H | -0.323654000 | 5.534028000  | -2.242170000 |
| O | -0.245871000 | -4.617572000 | -3.023027000 |
| H | -0.293218000 | -5.424350000 | -2.490954000 |
| C | -3.763035000 | -0.009644000 | 0.082628000  |
| C | -2.558438000 | -0.022029000 | 0.776837000  |
| C | -2.530076000 | -0.053152000 | 2.167729000  |
| C | -3.706866000 | -0.072794000 | 2.918887000  |
| C | -4.922168000 | -0.060484000 | 2.231094000  |
| C | -4.948440000 | -0.029227000 | 0.826077000  |
| C | -1.149829000 | -0.005681000 | 0.202343000  |
| N | -0.340680000 | -0.033049000 | 1.472566000  |
| C | -1.129861000 | -0.061235000 | 2.647938000  |
| H | -3.782562000 | 0.014232000  | -1.004811000 |
| H | -3.659313000 | -0.096963000 | 4.004992000  |
| H | -5.859028000 | -0.075280000 | 2.783561000  |
| H | -5.905872000 | -0.020225000 | 0.309412000  |
| O | -0.713063000 | -0.086536000 | 3.788605000  |
| N | 0.993585000  | -0.033254000 | 1.590833000  |
| C | 1.753865000  | -0.008247000 | 0.542164000  |
| C | 3.191155000  | -0.010388000 | 0.685332000  |
| C | 3.994967000  | -0.043809000 | 1.826412000  |
| N | 5.342755000  | -0.035373000 | 1.576917000  |
| C | 5.596631000  | 0.003088000  | 0.293988000  |
| S | 4.203055000  | 0.032518000  | -0.729066000 |
| H | 6.597840000  | 0.016449000  | -0.126552000 |
| C | 3.494945000  | -0.086339000 | 3.237654000  |
| H | 4.345788000  | -0.128341000 | 3.924911000  |
| H | 2.875657000  | 0.792154000  | 3.460016000  |
| H | 2.838492000  | -0.951437000 | 3.394675000  |
| H | 1.364021000  | 0.015133000  | -0.476953000 |

**Figure S13.** Cartesian coordinates of quantum chemical structures
